# Supplementary material
Source: ML conference proceedings conference paper supplement (https://openaccess.thecvf.com/content/CVPR2024/html/Guo_CPP-Net_Embracing_Multi-Scale_CVPR_2024_paper.html)
Supplement: Supplementary file [file Guo_CPP-Net_Embracing_Multi-Scale_CVPR_2024_supplemental.pdf]

# CPP-Net: Embracing Multi-Scale Feature Fusion into Deep Unfolding CP-PPA Network for Compressive Sensing

Zhen Guo

Northwestern Polytechnical University  
Xi'an 710072, China

guozhen2022@mail.nwpu.edu.cn

Hongping Gan\*

Northwestern Polytechnical University  
Xi'an 710072, China

ganhongping@nwpu.edu.cn

## 1. Overview

In this *Supplementary Material*, we first conduct the convergence analysis of our proposed deep unfolding CP-PPA framework in Sec. 2. Subsequently, we provide more details and comparisons in Sec. 3, including detailed experiments settings in Sec. 3.1, more comparisons results in Sec. 3.2, performance under salt-and-pepper noise in Sec. 3.3, more CS-MRI comparisons results in Sec. 3.4 and more visualization results in Sec. 3.5.

## 2. Convergence Analysis

In the previous section (Sec. 3.2 in the main text), we reformulate the Eq. (1) into a more tractable form denoted as Eq. (6). From this, we derive the following iterative steps: Eq. (8), Eq. (9), and Eq. (10). Furthermore, we obtain the deep unfolding form of the CP-PPA denoted as Eq. (15).

First, consider that  $\mathcal{D}(\mathbf{x}) = \mathbf{C}_2 \text{ReLU}(\mathbf{C}_1)$ , where  $\mathbf{C}_1$  and  $\mathbf{C}_2$  are convolutional operators. Let  $\mathbf{r}^{(k)} = \mathbf{x}^{(k-1)} - \eta^{(k)} \Phi^\top \mathbf{y}^{(k-1)}$ . By approximating based on Theorem 1 [27], we obtain:

$$\|\mathcal{D}(\mathbf{x}) - \mathcal{D}(\mathbf{r}^{(k)})\|_{\ell_2}^2 \approx \alpha \|\mathbf{x} - \mathbf{r}^{(k)}\|_{\ell_2}^2, \quad (20)$$

where  $\alpha$  is a constant related to  $\mathcal{D}(\cdot)$  and can be merged into the learnable parameter  $\lambda^{(k)}$ . Incorporating this relationship into Eq. (8), we derive:

$$\mathbf{x}^{(k)} = \arg \min_{\mathbf{x}} \lambda^{(k)} \eta^{(k)} \|\mathcal{D}(\mathbf{x})\|_{\ell_1} + \frac{1}{2} \|\mathcal{D}(\mathbf{x}) - \mathcal{D}(\mathbf{r}^{(k)})\|_{\ell_2}^2. \quad (21)$$

Thus, we obtain the closed form of  $\mathcal{D}(\mathbf{x}^{(k)})$ :

$$\mathcal{D}(\mathbf{x}^{(k)}) = \mathcal{S}_{\lambda^{(k)} \eta^{(k)}}(\mathcal{D}(\mathbf{r}^{(k)})). \quad (22)$$

Let  $\tilde{\mathcal{D}}(\cdot)$  be the left inverse of  $\mathcal{D}(\cdot)$ , we derive:

$$\mathbf{x}^{(k)} = \tilde{\mathcal{D}}(\mathcal{S}_{\lambda^{(k)} \eta^{(k)}}(\mathcal{D}(\mathbf{r}^{(k)}))). \quad (23)$$

\*Corresponding author.

Thus, the optimal solution to Eq. (8) is proven to be Eq. (23).

**Lemma 1** Let  $\chi \in \mathfrak{R}^n$  be a closed convex set,  $\xi(\mathbf{x})$  and  $\varphi(\mathbf{x})$  be convex functions, with  $\varphi(\mathbf{x})$  being differentiable. Assume that the solution set of the minimization problem  $\min\{\xi(\mathbf{x}) + \varphi(\mathbf{x}) | \mathbf{x} \in \chi\}$  is nonempty. Then,

$$\mathbf{x}^* \in \arg \min\{\xi(\mathbf{x}) + \varphi(\mathbf{x}) | \mathbf{x} \in \chi\}, \quad (24)$$

if and only if

$$\begin{aligned} \mathbf{x}^* \in \chi, \xi(\mathbf{x}) - \xi(\mathbf{x}^*) + \\ (\mathbf{x} - \mathbf{x}^*)^\top \nabla \varphi(\mathbf{x}^*) \geq 0, \forall \mathbf{x} \in \chi. \end{aligned} \quad (25)$$

Then, we delve into the convergence analysis of Eq. (15). Assuming that the pair  $(\mathbf{x}^{(k)}, \mathbf{y}^{(k)})$  represents the optimal solution to Eq. (8) and Eq. (10), we can obtain the following equations in the form of mixed monotone variational inequalities [14] according to **Lemma 1**:

$$\begin{cases} f(\mathbf{x}) - f(\mathbf{x}^{(k)}) + (\mathbf{x} - \mathbf{x}^{(k)})^\top ( \\ \quad \Phi^\top \mathbf{y}^{(k-1)} + \alpha^{(k)} (\mathbf{x}^{(k)} - \mathbf{x}^{(k-1)})) \geq 0, \\ h^*(\mathbf{y}) - h^*(\mathbf{y}^{(k)}) + (\mathbf{y} - \mathbf{y}^{(k)})^\top ( \\ \quad -\Phi \mathbf{v}^{(k)} + \beta^{(k)} (\mathbf{y}^{(k)} - \mathbf{y}^{(k-1)})) \geq 0. \end{cases} \quad (26)$$

By defining  $\mathbf{u} = (\mathbf{x}, \mathbf{y})^\top$  and  $\zeta(\mathbf{u}) = f(\mathbf{x}) + h^*(\mathbf{y})$ , we rewrite Eq. (26) as follows:

$$\begin{aligned} \zeta(\mathbf{u}) - \zeta(\mathbf{u}^{(k)}) + (\mathbf{u} - \mathbf{u}^{(k)})^\top \\ \left\{ \begin{pmatrix} \Phi^\top \mathbf{y}^{(k-1)} \\ -\Phi \mathbf{v}^{(k)} \end{pmatrix} + \begin{pmatrix} \alpha^{(k)} (\mathbf{x}^{(k)} - \mathbf{x}^{(k-1)}) \\ \beta^{(k)} (\mathbf{y}^{(k)} - \mathbf{y}^{(k-1)}) \end{pmatrix} \right\} \geq 0. \end{aligned} \quad (27)$$

Substituting Eq. (9) into Eq. (27), we obtain:

$$\begin{aligned} \zeta(\mathbf{u}) - \zeta(\mathbf{u}^{(k)}) + (\mathbf{u} - \mathbf{u}^{(k)})^\top \left\{ \begin{pmatrix} \Phi^\top \mathbf{y}^{(k)} \\ -\Phi \mathbf{x}^{(k)} \end{pmatrix} + \right. \\ \left. \begin{pmatrix} \alpha^{(k)} (\mathbf{x}^{(k)} - \mathbf{x}^{(k-1)}) - \Phi^\top (\mathbf{y}^{(k)} - \mathbf{y}^{(k-1)}) \\ -\Phi (\mathbf{x}^{(k)} - \mathbf{x}^{(k-1)}) + \beta^{(k)} (\mathbf{y}^{(k)} - \mathbf{y}^{(k-1)}) \end{pmatrix} \right\} \geq 0. \end{aligned} \quad (28)$$

Hence, we can reformulate Eq. (28) as follows:

$$\zeta(\mathbf{u}) - \zeta(\mathbf{u}^{(k)}) + (\mathbf{u} - \mathbf{u}^{(k)})^\top \{ \mathbf{G}(\mathbf{u}^{(k)}) + \mathbf{Q}(\mathbf{u}^{(k)} - \mathbf{u}^{(k-1)}) \} \geq 0, \quad (29)$$

where

$$\mathbf{G} = \begin{pmatrix} 0 & \Phi^\top \\ -\Phi & 0 \end{pmatrix}, \quad (30)$$

and

$$\mathbf{Q} = \begin{pmatrix} \alpha^{(k)}\mathbf{I} & -\Phi^\top \\ -\Phi & \beta^{(k)}\mathbf{I} \end{pmatrix}. \quad (31)$$

Note that Eq. (29) is the generalized form of PPA [8, 14], and in the case of  $\alpha^{(k)}\beta^{(k)} > \|\Phi^\top\Phi\|_{\ell_2}$ ,  $\mathbf{Q}$  is symmetric and positive definite, thus the sequence  $\{x^{(k)}\}$  and  $\{y^{(k)}\}$  converge to the solution point of the Eq. (6).

### 3. More Experiments

#### 3.1. Experimental Settings

We employed a dataset of 41,000 images, with 40,000 for training and 1,000 for validation, randomly selected from the COCO2017 unlabeled images dataset [12]. During training, we applied random cropping to resize images to  $96 \times 96$  and employed data augmentation techniques, such as scaling and rotation. We first pretrained the CPP-Net at a CS ratio of 0.25. Subsequently, we fine-tuned the CPP-Net at various CS ratios based on the pretrained CPP-Net at 0.25 CS ratio. LPIPS was obtained using VGG as the base network. See Tab. 1 for detailed configurations.

Table 1. The configurations of pretraining and fine-tuning.

| Configurations         | Pretraining                    | Fine-tuning      |
|------------------------|--------------------------------|------------------|
| base learning rate     | 8e-5                           | 4e-5             |
| min learning rate      | 1e-6                           | 1e-6             |
| optimizer              | AdamW                          | AdamW            |
| weight decay           | 0.05                           | 0.05             |
| optimizer momentum     | 0.9, 0.999                     | 0.9, 0.999       |
| batch size             | 8                              | 8                |
| training epochs        | 400                            | 400              |
| warmup epochs          | 10                             | 10               |
| warmup schedule        | linear                         | linear           |
| learning rate schedule | cosine annealing               | cosine annealing |
| block size             | 32                             | 32               |
| stages conut           | 8                              | 8                |
| channel count          | 32                             | 32               |
| weight init            | trunc.normal (0.2)             | -                |
| $\eta^{(k)}$           | 1e-3                           | -                |
| $\delta^{(k)}$         | 1e-3                           | -                |
| $\lambda^{(k)}$        | 1.0                            | -                |
| sampling matrix init   | Gaussian random matrix         | -                |
| implementation         | Pytorch 1.12.0                 |                  |
| CPU                    | Intel(R) Xeon(R) Gold 6226 CPU |                  |
| GPU                    | Tesla V100 PCIe 32GB           |                  |

#### 3.2. More Comparisons Results

In this subsection, we evaluated the performance of our CPP-Net with more competing methods and more CS ratios to demonstrate the effectiveness of our proposed CPP-Net across various CS ratios. The best and second-best results in the tables are highlighted in red and blue colors, respectively. First, we compared the performance of our CPP-Net with 21 competing methods, including pure DL-based methods (ReconNet [11], SCSNet [17], CSNet<sup>+</sup> [18], DPA-Net [23], MAC-Net [2], BCS-Net [33], NL-CSNet [4], AutoBCS [6], CSformer [25] and TCS-Net [7]), and deep unfolding networks (DUNs) (ISTA-Net<sup>+</sup> [27], OPINE-Net<sup>+</sup> [28], AMP-Net [31], COAST [26], CASNet [1], DGUNet<sup>+</sup> [13], FSOINet [3], TransCS [16], CT-Net+[30], DPC-DUN [20], MAPUN [19] and OCTUF [21]) on the Set11 [11] at seven CS ratios. The results are summarized in Tab. 2. It can be seen that our CPP-Net outperforms other methods with higher PSNR and SSIM on Set11 across all tested CS ratios. We then evaluated the performance of our CPP-Net with several recent methods on General100 [5] and Urban100 [9] at three high CS ratios, as shown in Tab. 3. Moreover, the LPIPS performance of recent methods at different CS ratios is presented in Tab. 4. Our CPP-Net still outperforms recent methods with higher image quality and human perception quality across all tested CS ratios on the General100 and Urban100. In summary, our CPP-Net can achieve superior image quality and improved human perception quality at both low and high CS ratios.

#### 3.3. Performance under Salt-and-Pepper Noise

We introduced varying proportions (denoted as  $\varsigma$ ) of salt-and-pepper noise to the images in Set11 and assessed the performance of our CPP-Net in handling noisy images. The variable  $\varsigma$  denotes the ratio of pixels in the images affected by salt-and-pepper noise. As shown in Tab. 5,  $\varsigma$  of salt-and-pepper noise is negatively correlated with the performance of each method, but our CPP-Net still outperforms other methods across all tested proportions of salt-and-pepper noise.

#### 3.4. More Comparisons Results of CS-MRI

In this subsection, we evaluated the performance of our CPP-Net on the single-coil knee dataset available within the fastMRI dataset [10] using the 1D Cartesian masks. The competing methods include DC-CNN [15], RDN [22], ISTA-Net<sup>+</sup> [27], CDDN [32], ADMM-CSNet [24], and HiTDUN [29]. Tab. 6 summarizes the results and Fig. 1 illustrates the visual comparisons of different CS-MRI methods. Compared with other methods, our CPP-Net performs better and reconstructs MRI images with more accurate details and less error.

Table 2. Comparisons of average PSNR (dB)/SSIM performance of various CS methods on Set11 at various CS ratios.

| Dataset                     | Methods                              | 0.01                | 0.04                | 0.10                | 0.25                | 0.30                | 0.40                | 0.50                | Avg.                |
|-----------------------------|--------------------------------------|---------------------|---------------------|---------------------|---------------------|---------------------|---------------------|---------------------|---------------------|
| Set11                       | ReconNet (CVPR 2016)                 | 17.43/0.4017        | 20.93/0.5897        | 24.38/0.7301        | 28.44/0.8531        | 29.09/0.8693        | 30.60/0.9020        | 32.25/0.9177        | 26.16/0.7519        |
|                             | SCSNet (CVPR 2019)                   | 21.04/0.5562        | 24.29/0.7589        | 28.52/0.8616        | 33.43/0.9373        | 34.64/0.9511        | 36.92/0.9666        | 39.01/0.9769        | 31.12/0.8584        |
|                             | CSNet <sup>+</sup> (TIP 2020)        | 20.69/0.5238        | 24.54/0.7445        | 28.12/0.8664        | 32.20/0.9337        | 33.70/0.9495        | 36.41/0.9677        | 38.28/0.9771        | 30.56/0.8518        |
|                             | DPA-Net (TIP 2020)                   | 18.05/0.5011        | 23.50/0.7205        | 26.99/0.8354        | 31.74/0.9238        | 33.35/0.9425        | 35.04/0.9565        | 36.73/0.9670        | 29.34/0.8353        |
|                             | MAC-Net (ECCV 2020)                  | 18.26/0.4003        | 24.22/0.6982        | 27.68/0.8182        | 32.91/0.9244        | 33.96/0.9372        | 35.94/0.9560        | 37.67/0.9668        | 30.09/0.8144        |
|                             | BCS-Net (TMM 2021)                   | 20.81/0.5427        | 24.90/0.7531        | 29.36/0.8650        | 34.20/0.9408        | 35.40/0.9527        | 36.52/0.9640        | 39.58/0.9734        | 31.54/0.8560        |
|                             | NL-CSNet (TMM 2021)                  | 21.96/0.6005        | 26.26/0.8108        | 30.05/0.8995        | - / -               | 35.68/0.9606        | - / -               | - / -               | - / -               |
|                             | AutoBCS (TCYB 2023)                  | 19.63/0.5605        | 24.73/0.7871        | 28.44/0.8827        | 33.56/0.9481        | 34.48/0.9549        | 36.51/0.9680        | 36.88/0.9732        | 30.60/0.8678        |
|                             | CSformer (TIP 2023)                  | 21.86/0.6071        | 26.41/0.8058        | 30.09/0.8925        | 34.99/0.9534        | - / -               | - / -               | 40.23/0.9802        | - / -               |
|                             | TCS-Net (TCI 2023)                   | 21.09/0.5505        | 25.46/0.7863        | 29.04/0.8834        | 33.94/0.9508        | 34.34/0.9541        | 35.27/0.9601        | 37.36/0.9723        | 30.93/0.8654        |
|                             | ISTA-Net <sup>+</sup> (CVPR 2018)    | 17.45/0.4131        | 21.56/0.6240        | 26.49/0.8036        | 32.44/0.9237        | 33.70/0.9382        | 36.02/0.9579        | 38.07/0.9706        | 29.39/0.8044        |
|                             | OPINE-Net <sup>+</sup> (J-STSP 2020) | 20.02/0.5362        | 25.52/0.7879        | 29.81/0.8904        | 34.81/0.9514        | 36.00/0.9600        | 38.31/0.9724        | 40.18/0.9800        | 32.09/0.8683        |
|                             | AMP-Net (TIP 2021)                   | 20.20/0.5581        | 25.26/0.7722        | 29.40/0.8779        | 34.63/0.9481        | 36.03/0.9586        | 38.28/0.9715        | 40.34/0.9807        | 32.02/0.8667        |
|                             | COAST (TIP 2021)                     | 12.40/0.2637        | 23.55/0.7158        | 28.70/0.8609        | 33.96/0.9405        | 35.09/0.9504        | 37.09/0.9645        | 38.92/0.9743        | 29.96/0.8100        |
|                             | CASNet (TIP 2022)                    | 21.76/0.6019        | 26.25/0.8118        | 30.29/0.9005        | 35.65/0.9592        | 36.90/0.9663        | 39.03/0.9760        | 40.93/0.9827        | 32.97/0.8855        |
|                             | DGUNet <sup>+</sup> (CVPR 2022)      | <b>22.15/0.6114</b> | <b>26.83/0.8230</b> | <b>30.93/0.9088</b> | <b>36.18/0.9616</b> | 36.72/0.9661        | 38.99/0.9766        | 41.24/0.9837        | <b>33.29/0.8902</b> |
|                             | FSOINet (ICASSP 2022)                | 21.73/0.5937        | 26.37/0.8119        | 30.44/0.9018        | 35.80/0.9595        | 37.00/0.9665        | 39.14/0.9764        | 41.08/0.9832        | 33.08/0.8847        |
|                             | TransCS (TIP 2022)                   | 20.15/0.5066        | 25.41/0.7883        | 29.54/0.8877        | 35.06/0.9548        | 35.62/0.9588        | 38.46/0.9737        | 40.49/0.9815        | 32.10/0.8645        |
|                             | CT-Net <sup>+</sup> (KBS 2023)       | - / -               | - / -               | 30.16/0.8966        | 35.58/0.9570        | 36.73/0.9642        | 38.49/0.9752        | 40.90/0.9822        | - / -               |
|                             | DPC-DUN (TIP 2023)                   | 18.03/0.4601        | 24.38/0.7498        | 29.42/0.8801        | 34.75/0.9483        | 35.88/0.9570        | 37.98/0.9694        | 39.84/0.9778        | 31.47/0.8489        |
| MAPUN (JCV 2023)            | - / -                                | - / -               | 30.19/0.9014        | 35.73/0.9602        | <b>37.08/0.9676</b> | <b>39.22/0.9775</b> | 40.98/0.9834        | - / -               |                     |
| OCTUF (CVPR 2023)           | 21.75/0.5934                         | 26.45/0.8126        | 30.70/0.9030        | 36.10/0.9604        | <b>37.21/0.9673</b> | <b>39.41/0.9773</b> | <b>41.34/0.9838</b> | 33.28/0.8854        |                     |
| <b>CPP-Net (Our Method)</b> | <b>22.19/0.6135</b>                  | <b>27.23/0.8337</b> | <b>31.27/0.9135</b> | <b>36.35/0.9631</b> | <b>37.55/0.9696</b> | <b>39.53/0.9781</b> | <b>41.39/0.9842</b> | <b>33.64/0.8937</b> |                     |

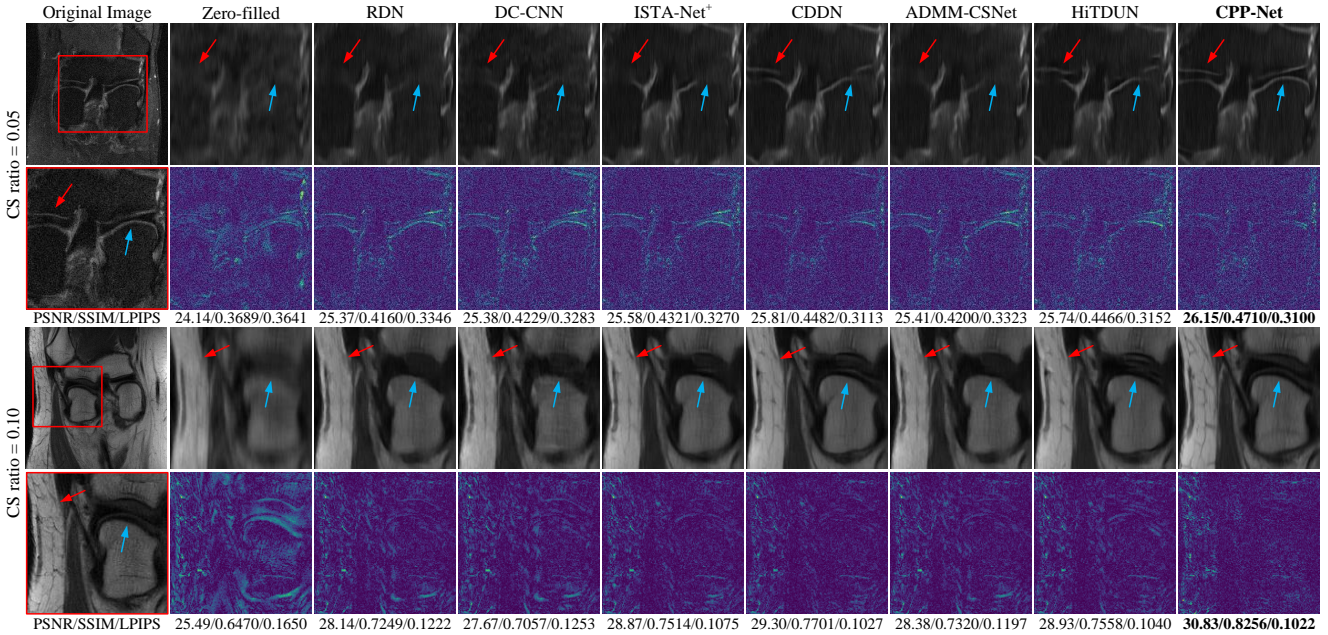

Figure 1. Comparisons of visualization, error maps and corresponding PSNR (dB)/SSIM/LPIPS performance of various CS-MRI methods on the fastMRI dataset using 1D Cartesian masks at CS ratios of 0.05 and 0.10. The arrows point to details in the reconstructed image for better comparison.

### 3.5. Additional Visualization Results

Fig. 2 shows the visualization of feature maps within the third stage of the different cases in the ablation study, which demonstrates that the integration of DPFB and IFS improves the ability of the CPP-Net to capture and extract fine texture details from the images.

### References

- [1] Bin Chen and Jian Zhang. Content-aware scalable deep compressed sensing. *IEEE Trans. Image Process.*, 31:5412–5426, 2022. 2
- [2] Jiwei Chen, Yubao Sun, Qingshan Liu, and Rui Huang. Learning memory augmented cascading network for compressed sensing of images. In *Eur. Conf. Comput. Vis.*, pages



Table 3. Comparisons of average PSNR (dB)/SSIM performance of recent CS methods on General100 and Set14 at high CS ratios.

| Datasets   | Methods             | 0.30                | 0.40                | 0.50                | Avg.                |
|------------|---------------------|---------------------|---------------------|---------------------|---------------------|
| General100 | CASNet              | 39.32/0.9730        | 41.56/0.9827        | 43.74/0.9887        | 41.54/0.9815        |
|            | DGUNet <sup>+</sup> | 38.87/0.9724        | 41.07/0.9821        | 43.26/0.9884        | 41.07/0.9810        |
|            | FSOINet             | 39.40/0.9735        | 41.62/0.9831        | 43.69/0.9887        | 41.57/0.9818        |
|            | OCTUF               | 39.54/0.9740        | 41.76/0.9833        | 43.95/0.9892        | 41.75/0.9822        |
|            | CPP-Net             | <b>39.65/0.9746</b> | <b>41.92/0.9838</b> | <b>44.07/0.9894</b> | <b>41.88/0.9826</b> |
| Urban100   | CASNet              | 33.35/0.9509        | 35.46/0.9668        | 37.46/0.9773        | 35.42/0.9650        |
|            | DGUNet <sup>+</sup> | 33.16/0.9510        | 35.24/0.9666        | 37.65/0.9785        | 35.35/0.9654        |
|            | FSOINet             | 33.84/0.9540        | 35.93/0.9688        | 37.80/0.9777        | 35.86/0.9668        |
|            | OCTUF               | 34.21/0.9555        | 36.25/0.9669        | 38.29/0.9797        | 36.25/0.9674        |
|            | CPP-Net             | <b>34.58/0.9586</b> | <b>36.50/0.9714</b> | <b>38.33/0.9801</b> | <b>36.47/0.9700</b> |

Table 4. Comparisons of average LPIPS performance of recent CS methods on General100 and Set14 at various CS ratios.

| Datasets   | CS Ratios | CASNet | DGUNet <sup>+</sup> | FSOINet       | OCTUF         | CPP-Net       |
|------------|-----------|--------|---------------------|---------------|---------------|---------------|
| General100 | 0.01      | 0.2198 | 0.2265              | <b>0.2184</b> | 0.2252        | <b>0.2130</b> |
|            | 0.04      | 0.1207 | 0.1208              | <b>0.1178</b> | 0.1194        | <b>0.1108</b> |
|            | 0.10      | 0.0690 | <b>0.0653</b>       | 0.0655        | 0.0659        | <b>0.0629</b> |
|            | 0.25      | 0.0311 | <b>0.0282</b>       | 0.0289        | 0.0287        | <b>0.0273</b> |
|            | 0.30      | 0.0247 | 0.0231              | <b>0.0224</b> | 0.0233        | <b>0.0214</b> |
|            | 0.40      | 0.0153 | 0.0142              | <b>0.0135</b> | 0.0137        | <b>0.0130</b> |
|            | 0.50      | 0.0091 | 0.0089              | 0.0079        | <b>0.0077</b> | <b>0.0075</b> |
|            | Avg.      | 0.0700 | 0.0696              | <b>0.0678</b> | 0.0691        | <b>0.0651</b> |
| Urban100   | 0.01      | 0.2866 | <b>0.2846</b>       | 0.2914        | 0.2969        | <b>0.2707</b> |
|            | 0.04      | 0.1731 | <b>0.1660</b>       | 0.1729        | 0.1748        | <b>0.1533</b> |
|            | 0.10      | 0.1070 | <b>0.0962</b>       | 0.1015        | 0.1027        | <b>0.0909</b> |
|            | 0.25      | 0.0520 | <b>0.0425</b>       | 0.0474        | 0.0449        | <b>0.0408</b> |
|            | 0.30      | 0.0424 | 0.0412              | 0.0382        | <b>0.0358</b> | <b>0.0328</b> |
|            | 0.40      | 0.0280 | 0.0278              | <b>0.0249</b> | 0.0258        | <b>0.0224</b> |
|            | 0.50      | 0.0185 | 0.0191              | 0.0183        | <b>0.0170</b> | <b>0.0150</b> |
|            | Avg.      | 0.1011 | <b>0.0968</b>       | 0.0992        | 0.0997        | <b>0.0894</b> |

Table 5. Average PSNR (dB)/SSIM comparisons of various methods under different proportions  $\zeta$  of salt-and-pepper noise on Set14 at CS ratios of 0.04 and 0.10.

| CS Ratios | $\zeta$ | CASNet       | DGUNet <sup>+</sup> | FSOINet      | OCTUF        | CPP-Net             |
|-----------|---------|--------------|---------------------|--------------|--------------|---------------------|
| 0.04      | 0.01    | 25.85/0.7855 | <b>26.16/0.7920</b> | 25.82/0.7800 | 25.85/0.7814 | <b>26.45/0.7969</b> |
|           | 0.02    | 25.45/0.7615 | <b>25.65/0.7619</b> | 25.34/0.7542 | 25.40/0.7558 | <b>25.98/0.7702</b> |
|           | 0.04    | 24.71/0.7172 | <b>24.91/0.7214</b> | 24.61/0.7102 | 24.71/0.7149 | <b>25.14/0.7248</b> |
|           | 0.08    | 23.69/0.6538 | <b>23.74/0.6545</b> | 23.43/0.6425 | 23.56/0.6447 | <b>23.91/0.6575</b> |
| 0.10      | 0.01    | 27.93/0.8203 | <b>28.21/0.8252</b> | 27.98/0.8194 | 28.15/0.8207 | <b>28.52/0.8286</b> |
|           | 0.02    | 26.81/0.7687 | <b>27.07/0.7699</b> | 26.86/0.7635 | 27.01/0.7644 | <b>27.29/0.7720</b> |
|           | 0.04    | 25.31/0.6855 | <b>25.49/0.6857</b> | 25.26/0.6797 | 25.42/0.6833 | <b>25.64/0.6863</b> |
|           | 0.08    | 23.39/0.5777 | <b>23.43/0.5796</b> | 23.26/0.5734 | 23.33/0.5725 | <b>23.54/0.5798</b> |

Table 6. Average PSNR (dB)/SSIM performance comparisons of recent CS-MRI methods on fastMRI dataset using Cartesian masks at different CS ratios.

| Methods               | 0.05                | 0.10                | 0.15                | Avg.                |
|-----------------------|---------------------|---------------------|---------------------|---------------------|
| Zero-filled           | 23.23/0.4564        | 25.38/0.5314        | 26.31/0.5763        | 24.97/0.5214        |
| DC-CNN                | 26.81/0.5432        | 27.07/0.5899        | 27.92/0.6624        | 27.27/0.5985        |
| RDN                   | 27.00/0.5630        | 27.32/0.5967        | 28.89/0.6911        | 27.74/0.6169        |
| ISTA-Net <sup>+</sup> | 27.31/0.5594        | 27.82/0.6128        | 29.27/0.7027        | 28.13/0.6250        |
| CDDN                  | <b>27.45/0.5649</b> | <b>28.04/0.6208</b> | <b>29.46/0.7094</b> | <b>28.32/0.6317</b> |
| ADMM-CSNet            | 27.06/0.5512        | 27.43/0.5999        | 28.79/0.6898        | 27.76/0.6136        |
| HiTDUN                | 27.40/0.5630        | 28.02/0.6208        | 29.32/0.7053        | 28.25/0.6297        |
| CPP-Net               | <b>27.74/0.5764</b> | <b>28.90/0.6498</b> | <b>29.67/0.7161</b> | <b>28.77/0.6474</b> |

513–529, 2020. 2

[3] Wenjun Chen, Chunling Yang, and Xin Yang. FSOINET: Feature-space optimization-inspired network for image com-

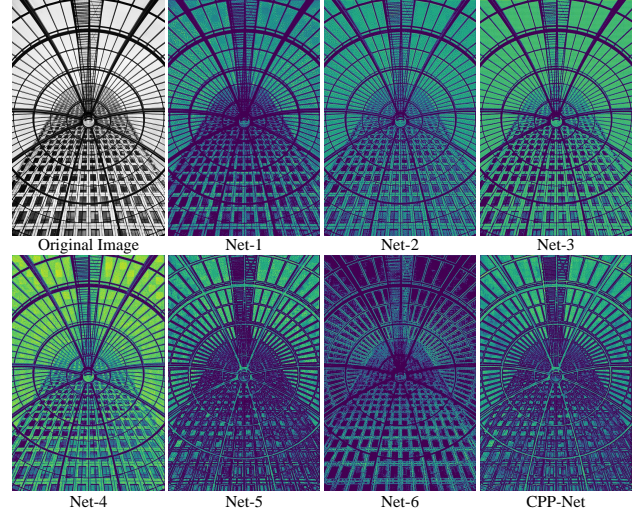

Figure 2. Visualization of feature maps for third stage of different ablation study cases at a CS ratio of 0.10. The integration of DPFb and IFS enhances CPP-Net’s attention to detail.

pressive sensing. In *IEEE Int. Conf. Acoust. Speech Signal Process.*, pages 2460–2464, 2022. 2

- [4] Wenxue Cui, Shaohui Liu, Feng Jiang, and Debin Zhao. Image compressed sensing using non-local neural network. *IEEE Trans. Multimedia*, 25:816–830, 2021. 2
- [5] Chao Dong, Chen Change Loy, and Xiaoou Tang. Accelerating the super-resolution convolutional neural network. In *Eur. Conf. Comput. Vis.*, pages 391–407. 2016. 2
- [6] Hongping Gan, Yang Gao, Chunyi Liu, Haiwei Chen, Tao Zhang, and Feng Liu. AutoBCS: Block-based image compressive sensing with data-driven acquisition and noniterative reconstruction. *IEEE Trans. Cybern.*, 53(4):2558–2571, 2023. 2
- [7] Hongping Gan, Minghe Shen, Yi Hua, Chunyan Ma, and Tao Zhang. From patch to pixel: A transformer-based hierarchical framework for compressive image sensing. *IEEE Trans. Comput. Imaging*, 9:133–146, 2023. 2
- [8] Bingsheng He and Xiaoming Yuan. Convergence analysis of primal-dual algorithms for a saddle-point problem: From contraction perspective. *SIAM J. Imaging Sci.*, 5(1):119–149, 2012. 2
- [9] Jia-Bin Huang, Abhishek Singh, and Narendra Ahuja. Single image super-resolution from transformed self-exemplars. In *IEEE Conf. Comput. Vis. Pattern Recognit.*, pages 5197–5206, 2015. 2
- [10] Florian Knoll, Jure Zbontar, Anuroop Sriram, Matthew J. Muckley, Mary Bruno, Aaron Defazio, Marc Parente, Krzysztof J. Geras, Joe Katsnelson, Hersh Chandarana, Zizhao Zhang, Michal Drozdal, Adriana Romero, Michael Rabbat, Pascal Vincent, James Pinkerton, Duo Wang, Nafissa Yakubova, Erich Owens, C. Lawrence Zitnick, Michael P. Recht, Daniel K. Sodickson, and Yvonne W. Lui. fastMRI: A publicly available raw  $k$ -space and dicom dataset of knee images for accelerated MR image reconstruc-

- tion using machine learning. *Radiology: Artif. Intell.*, 2(1): e190007, 2020. 2
- [11] Kuldeep Kulkarni, Suhas Lohit, Pavan Turaga, Ronan Ker- viche, and Amit Ashok. ReconNet: Non-iterative recon- struction of images from compressively sensed measurements. In *IEEE Conf. Comput. Vis. Pattern Recognit.*, pages 449–458, 2016. 2
- [12] Tsung-Yi Lin, Michael Maire, Serge Belongie, James Hays, Pietro Perona, Deva Ramanan, Piotr Dollár, and C. Lawrence Zitnick. Microsoft COCO: Common objects in context. In *Eur. Conf. Comput. Vis.*, pages 740–755, 2014. 2
- [13] Chong Mou, Qian Wang, and Jian Zhang. Deep general- ized unfolding networks for image restoration. In *IEEE/CVF Conf. Comput. Vis. Pattern Recognit.*, pages 17378–17389, 2022. 2
- [14] R. Tyrrell Rockafellar. Monotone operators and the proximal point algorithm. *SIAM J. Control Optim.*, 14(5):877–898, 1976. 1, 2
- [15] Jo Schlemper, Jose Caballero, Joseph V. Hajnal, Anthony N. Price, and Daniel Rueckert. A deep cascade of convolu- tional neural networks for dynamic MR image reconstruc- tion. *IEEE Trans. Med. Imag.*, 37(2):491–503, 2018. 2
- [16] Minghe Shen, Hongping Gan, Chao Ning, Yi Hua, and Tao Zhang. TransCS: A transformer-based hybrid architecture for image compressed sensing. *IEEE Trans. Image Process.*, 31:6991–7005, 2022. 2
- [17] Wuzhen Shi, Feng Jiang, Shaohui Liu, and Debin Zhao. Scalable convolutional neural network for image compressed sensing. In *IEEE/CVF Conf. Comput. Vis. Pattern Recognit.*, pages 12290–12299, 2019. 2
- [18] Wuzhen Shi, Feng Jiang, Shaohui Liu, and Debin Zhao. Im- age compressed sensing using convolutional neural network. *IEEE Trans. Image Process.*, 29:375–388, 2020. 2
- [19] Jiechong Song, Bin Chen, and Jian Zhang. Deep memory- augmented proximal unrolling network for compressive sensing. *Int. J. Comput. Vis.*, 131(6):1477–1496, 2023. 2
- [20] Jiechong Song, Bin Chen, and Jian Zhang. Dynamic path- controllable deep unfolding network for compressive sens- ing. *IEEE Trans. Image Process.*, 32:2202–2214, 2023. 2
- [21] Jiechong Song, Chong Mou, Shiqi Wang, Siwei Ma, and Jian Zhang. Optimization-inspired cross-attention transformer for compressive sensing. In *IEEE/CVF Conf. Comput. Vis. Pattern Recognit.*, 2023. 2
- [22] Liyan Sun, Zhiwen Fan, Yue Huang, Xinghao Ding, and John Paisley. Compressed sensing MRI using a recursive dilated network. In *AAAI Conf. Artif. Intell.*, 2018. 2
- [23] Yubao Sun, Jiwei Chen, Qingshan Liu, Bo Liu, and Guodong Guo. Dual-path attention network for compressed sens- ing image reconstruction. *IEEE Trans. Image Process.*, 29: 9482–9495, 2020. 2
- [24] Yan Yang, Jian Sun, Huibin Li, and Zongben Xu. ADMM- CSNet: A deep learning approach for image compressive sensing. *IEEE Trans. Pattern Anal. Mach. Intell.*, 42(3):521– 538, 2020. 2
- [25] Dongjie Ye, Zhangkai Ni, Hanli Wang, Jian Zhang, Shiqi Wang, and Sam Kwong. CSformer: Bridging convolution and transformer for compressive sensing. *IEEE Trans. Image Process.*, 32:2827–2842, 2023. 2
- [26] Di You, Jian Zhang, Jingfen Xie, Bin Chen, and Siwei Ma. COAST: Controllable arbitrary-sampling network for com- pressive sensing. *IEEE Trans. Image Process.*, 30:6066– 6080, 2021. 2
- [27] Jian Zhang and Bernard Ghanem. ISTA-Net: Interpretable optimization-inspired deep network for image compressive sensing. In *IEEE Conf. Comput. Vis. Pattern Recognit.*, pages 1828–1837, 2018. 1, 2
- [28] Jian Zhang, Chen Zhao, and Wen Gao. Optimization- inspired compact deep compressive sensing. *IEEE J. Sel. Top. Signal Process.*, 14(4):765–774, 2020. 2
- [29] Jian Zhang, Zhenyu Zhang, Jingfen Xie, and Yongbing Zhang. High-throughput deep unfolding network for com- pressive sensing MRI. *IEEE J. Sel. Top. Signal Process.*, 16 (4):750–761, 2022. 2
- [30] Tianfang Zhang, Lei Li, and Zhenming Peng. Optimiza- tion-inspired cumulative transmission network for image com- pressive sensing. *Knowl.-Based Syst.*, 279:110963, 2023. 2
- [31] Zhonghao Zhang, Yipeng Liu, Jiani Liu, Fei Wen, and Ce Zhu. AMP-Net: Denoising-based deep unfolding for com- pressive image sensing. *IEEE Trans. Image Process.*, 30: 1487–1500, 2021. 2
- [32] Hao Zheng, Faming Fang, and Guixu Zhang. Cascaded di- lated dense network with two-step data consistency for MRI reconstruction. In *Adv. Neural Inform. Process. Syst.*, 2019. 2
- [33] Siwang Zhou, Yan He, Yonghe Liu, Chengqing Li, and Jian- ming Zhang. Multi-channel deep networks for block-based image compressive sensing. *IEEE Trans. Multimedia*, 23: 2627–2640, 2021. 2
